# Supplementary material
Source: Springer Nature journal article supplement (https://www.springermedizin.de/resource/supplementary/12950_2011_227_MOESM1_ESM.pdf/9558276)
Supplement: MOESM1 [file 9558276]

|               | ESR (1h)           | CRP (mg/L)         | Leukocytes (10 <sup>3</sup> /mm <sup>3</sup> ) | TNF- $\alpha$ (pg/mL) | IL-18 (pg/mL) | MPO (U/mg protein) | e-TBARS (nmol/gHb) | e-SOD (U/gHb) | e-CAT (U/gHb) | AOA (%) | FRAP ( $\mu$ mol/L) | TEAC (trolox equiv) |
|---------------|--------------------|--------------------|------------------------------------------------|-----------------------|---------------|--------------------|--------------------|---------------|---------------|---------|---------------------|---------------------|
| ESR           |                    |                    |                                                |                       |               |                    |                    |               |               |         |                     |                     |
| CRP           | 0.535 <sup>#</sup> |                    |                                                |                       |               |                    |                    |               |               |         |                     |                     |
| Leuk          | 0.344 <sup>#</sup> | 0.354 <sup>#</sup> |                                                |                       |               |                    |                    |               |               |         |                     |                     |
| TNF- $\alpha$ | 0.154              | -0.029             | -0.030                                         |                       |               |                    |                    |               |               |         |                     |                     |
| IL-18         | -0.011             | 0.063              | 0.032                                          | 0.184                 |               |                    |                    |               |               |         |                     |                     |
| MPO           | 0.185              | 0.036              | 0.039                                          | 0.232*                | 0.048         |                    |                    |               |               |         |                     |                     |
| e-TBARS       | 0.041              | -0.202*            | 0.009                                          | 0.289*                | 0.238*        | 0.254*             |                    |               |               |         |                     |                     |
| e-SOD         | -0.076             | -0.241*            | -0.159                                         | 0.245*                | -0.017        | 0.210*             | 0.219*             |               |               |         |                     |                     |
| e-CAT         | 0.034              | 0.015              | -0.096                                         | 0.093                 | 0.086         | 0.197              | 0.273*             | 0.094         |               |         |                     |                     |
| AOA           | -0.003             | 0.170              | 0.122                                          | -0.142                | -0.059        | -0.243*            | 0.001              | -0.214*       | 0.048         |         |                     |                     |
| FRAP          | -0.168             | 0.115              | -0.076                                         | -0.013                | 0.122         | -0.343*            | -0.056             | -0.295*       | 0.090         | 0.085   |                     |                     |
| TEAC          | 0.002              | 0.093              | 0.078                                          | 0.211                 | -9E-5         | 0.151              | -0.176             | 0.065         | 0.058         | -0.149  | -0.013              |                     |

\* represents  $p < 0.05$ , # represents  $p < 0.001$
